# Supplementary material for: Grassland-woodland transitions over decadal timescales in the Terai-Duar Savanna and Grasslands of the Indian subcontinent.
Source: Research Square preprint supplement (doi:10.21203/rs.3.rs-1398899/v1), 2022-03-16
Supplement: Supplementary file 1 [file 019dae8996407e18ae7698f9.docx]

**Supplementary Table 2**

| **SHUKLA PHANTA NP** | | | | | | |  |  |
| --- | --- | --- | --- | --- | --- | --- | --- | --- |
|  | **Landcover (2019)** | | | |  |  |  |  |
| **Landcover (1989)** | Grassland | Sand and Openland | Waterbody | Woodland |  | **Total** |  |  |
| Grassland | 74.69 | 17.07 | 8.18 | 87.71 |  | 187.65 |  |  |
| Sand and Openland | 2.10 | 7.49 | 4.05 | 0.27 |  | 13.91 |  |  |
| Waterbody | 0.61 | 0.82 | 0.56 | 0.31 |  | 2.29 |  |  |
| Woodland | 14.16 | 1.48 | 3.22 | 164.88 |  | 183.73 |  |  |
|  |  |  |  |  |  |  |  |  |
| **Total** | 91.56 | 26.85 | 16.02 | 253.16 |  | 387.59 |  |  |

| **DUDHWA NP** | | | | | | | | | | | | | | | |
| --- | --- | --- | --- | --- | --- | --- | --- | --- | --- | --- | --- | --- | --- | --- | --- |
|  | **Landcover (2019)** | | | | | | | | | | | | |  |  |
| **Landcover (1989)** | Grassland | | Sand and Openland | | Waterbody | | Woodland | | | Cropland | | Human Settlement | |  | **Total** |
| Cropland | 88.71 | | 2.99 | | 17.05 | | 123.16 | | | 13.17 | | 8.30 | |  | 253.37 |
| Grassland | 0.48 | | 1.16 | | 0.18 | | 0.18 | | | 0.99 | | 0.98 | |  | 3.97 |
| Sand and Openland | 0.49 | | 1.32 | | 0.56 | | 0.25 | | | 1.49 | | 1.01 | |  | 5.12 |
| Waterbody | 3.91 | | 0.15 | | 3.61 | | 374.31 | | | 7.66 | | 0.30 | |  | 389.93 |
| Woodland | 7.63 | | 12.13 | | 2.69 | | 9.02 | | | 65.37 | | 21.19 | |  | 118.03 |
| Human Settlement | 0.00 | | 0.00 | | 0.00 | | 0.00 | | | 0.00 | | 0.00 | |  | 0.00 |
|  |  | |  | |  | |  | | |  | |  | |  |  |
| **Total** | 101.21 | | 17.74 | | 24.09 | | 506.91 | | | 88.69 | | 31.79 | |  | 770.43 |
| **BARDIYA NP** | | | | | | | | | | | | |
|  | | **Landcover (2019)** | | | | | | |  | |  | |
| **Landcover (1989)** | | Grassland | | Sand and Openland | | Waterbody | | Woodland |  | | **Total** | |
| **Grassland** | | 47.01 | | 7.13 | | 4.40 | | 22.34 |  | | 80.88 | |
| **Sand and Openland** | | 10.42 | | 12.62 | | 5.79 | | 1.60 |  | | 30.43 | |
| **Waterbody** | | 3.21 | | 3.96 | | 3.81 | | 1.13 |  | | 12.11 | |
| **Woodland** | | 47.98 | | 2.01 | | 3.81 | | 701.84 |  | | 755.63 | |
|  | |  | |  | |  | |  |  | |  | |
| **Total** | | 108.63 | | 25.71 | | 17.81 | | 726.90 |  | | 879.05 | |

| **VALMIKI TR** | | | | | | | |
| --- | --- | --- | --- | --- | --- | --- | --- |
|  | **Landcover (2019)** | | | | |  |  |
| **Landcover (1989)** | Grassland | Sand and Openland | Waterbody | Woodland | Cropland |  | **Total** |
| Grassland | 92.98 | 8.12 | 2.38 | 30.92 | 46.61 |  | 181.02 |
| Sand and Openland | 4.14 | 7.46 | 3.45 | 0.34 | 6.88 |  | 22.27 |
| Waterbody | 1.57 | 0.83 | 2.11 | 0.59 | 1.40 |  | 6.50 |
| Woodland | 114.29 | 1.00 | 0.44 | 574.32 | 5.71 |  | 695.76 |
| Cropland | 0.00 | 0.00 | 0.00 | 0.00 | 0.00 |  | 0.00 |
|  |  |  |  |  |  |  |  |
| **Total** | 212.98 | 17.42 | 8.39 | 606.16 | 60.60 |  | 905.55 |

| **CHITWAN NP** | | | | | | |
| --- | --- | --- | --- | --- | --- | --- |
|  | **Landcover (2019)** | | | |  |  |
| **Landcover (1989)** | Grassland | Sand and Openland | Waterbody | Woodland |  | **Total** |
| Grassland | 55.60 | 31.54 | 19.96 | 130.79 |  | 237.89 |
| Sand and Openland | 14.86 | 25.63 | 10.12 | 1.79 |  | 52.40 |
| Waterbody | 4.19 | 6.42 | 10.21 | 0.72 |  | 21.55 |
| Woodland | 6.52 | 2.96 | 0.71 | 855.88 |  | 866.07 |
|  |  |  |  |  |  |  |
| **Total** | 81.17 | 66.55 | 41.00 | 989.18 |  | 1177.91 |

| **KOSHI TAPPU WLS** | | | | | | |
| --- | --- | --- | --- | --- | --- | --- |
|  | **Landcover (2019)** | | | |  |  |
| **Landcover (1989)** | Grassland | Sand and Openland | Waterbody | Woodland |  | **Total** |
| Grassland | 19.20 | 6.47 | 8.45 | 12.46 |  | 46.58 |
| Sand and Openland | 17.65 | 2.77 | 7.03 | 12.16 |  | 39.61 |
| Waterbody | 4.44 | 2.10 | 2.13 | 2.28 |  | 10.97 |
| Woodland | 19.20 | 10.38 | 13.16 | 8.80 |  | 51.53 |
|  |  |  |  |  |  |  |
| **Total** | 60.50 | 21.72 | 30.78 | 35.70 |  | 148.70 |

| **JALDAPARA NP** | | | | | | | |
| --- | --- | --- | --- | --- | --- | --- | --- |
|  | **Landcover (2019)** | | | | |  |  |
| **Landcover (1989)** | Grassland | Sand and Openland | Waterbody | Woodland | Cropland |  | **Total** |
| Grassland | 28.96 | 11.85 | 4.71 | 8.70 | 11.64 |  | 65.86 |
| Sand and Openland | 4.31 | 3.30 | 1.36 | 0.01 | 0.19 |  | 9.16 |
| Waterbody | 6.98 | 6.23 | 3.13 | 0.06 | 0.53 |  | 16.93 |
| Woodland | 8.70 | 3.60 | 2.61 | 112.83 | 9.91 |  | 137.65 |
| Cropland | 0.00 | 0.00 | 0.00 | 0.00 | 0.00 |  | 0.00 |
|  |  |  |  |  |  |  |  |
| **Total** | 48.95 | 24.99 | 11.81 | 121.59 | 22.27 |  | 229.61 |

| **MANAS NP** | | | | | | | |
| --- | --- | --- | --- | --- | --- | --- | --- |
|  | **Landcover (2019)** | | | | |  |  |
| **Landcover (1989)** | Grassland | Sand and Openland | Waterbody | Woodland | Cropland |  | **Total** |
| Grassland | 184.17 | 7.00 | 3.09 | 145.85 | 23.98 |  | 364.10 |
| Sand and Openland | 13.37 | 2.25 | 0.78 | 0.97 | 5.20 |  | 22.58 |
| Waterbody | 5.76 | 0.43 | 0.21 | 0.81 | 1.72 |  | 8.94 |
| Woodland | 14.47 | 2.21 | 1.22 | 128.02 | 8.71 |  | 154.62 |
| Cropland | 0.00 | 0.00 | 0.00 | 0.00 | 0.00 |  | 0.00 |
|  |  |  |  |  |  |  |  |
| **Total** | 217.78 | 11.89 | 5.31 | 275.65 | 39.61 |  | 550.24 |
