# Supplementary material for: Grassland-woodland transitions over decadal timescales in the Terai-Duar Savanna and Grasslands of the Indian subcontinent.
Source: Research Square preprint supplement (doi:10.21203/rs.3.rs-1398899/v1), 2022-03-16
Supplement: Supplementary file 2 [file 27262334fe94e91d59c56f4a.docx]

**Supplementary Table 3**

| **Protected Area** | **Landsat Image Acquisition Date, Path-Row, and Sensor** | | |
| --- | --- | --- | --- |
| **1988-1989** | **2003-2004** | **2018-2019** |
| Shukla Phanta National Park | 22 Feb 1989 144-040 5 TM | 21 Feb 2003 144-040 7 ETM+ | 25 Feb 2019 144-040 8 OLI |
| Dudhwa National Park | 22 Feb 1989 144-040 5 TM | 21 Feb 2003 144-040 7 ETM+ | 25 Feb 2019 144-040 8 OLI |
| Bardiya National Park | 22 Feb 1989 144-040 5 TM | 21 Feb 2003 144-040 7 ETM+ | 25 Feb 2019 144-040 8 OLI |
| Valmiki Tiger Reserve | 17 Feb 1989 141-041 5 TM | 25 Dec 2003 141-041 5 TM | 12 Mar 2018 141-041 8 OLI |
| 24 Feb 1989 142-041 5 TM | 18 Feb 2004 142-041 5 TM | 12 Mar 2018 142-041 8 OLI |
| Chitwan National Park | 17 Feb 1989 141-041 5 TM | 25 Dec 2003 141-041 5 TM | 12 Mar 2018 141-041 8 OLI |
| 24 Feb 1989 142-041 5 TM | 18 Feb 2004 142-041 5 TM | 12 Mar 2018 142-041 8 OLI |
| Koshi Tappu WLS | 10 Feb 1989 140-042 5 TM | 07 Mar 2004 140-042 5 TM | 13 Feb 2019 140-041 8 OLI |
| Jaldapara National Park | 28 Feb 1989 138-042 5 TM | 09 Mar 2004 138-042 5 TM | 30 Jan 2019 138-042 8 OLI |
| Manas National Park | 13 Feb 1989 137-041 4 TM | 20 Feb 2003 137-042 7 ETM+ | 23 Jan 2019 137-042 8 OLI |
| 13 Feb 1989 137-042 4 TM |
