# Supplementary material for: Grassland-woodland transitions over decadal timescales in the Terai-Duar Savanna and Grasslands of the Indian subcontinent.
Source: Research Square preprint supplement (doi:10.21203/rs.3.rs-1398899/v1), 2022-03-16
Supplement: Supplementary file 3 [file 43c75d949eca67b4cf6138b9.docx]

| **Protected Area** | **Grassland Area (km2)** | | | **Woodland Area (km2)** | | | **Total Area (km2)** |
| --- | --- | --- | --- | --- | --- | --- | --- |
|
| **1988-1989** | **2003-2004** | **2018-2019** | **1988-1989** | **2003-2004** | **2018-2019** |
| Shukla Phanta National Park | 187.7 | 88.3 | 91.6 | 183.7 | 276.2 | 253.2 | 388.2 |
| Dudhwa National Park | 253.4 | 186.5 | 101.2 | 389.9 | 413.2 | 506.9 | 771.3 |
| Bardiya National Park | 80.9 | 170.3 | 108.6 | 755.6 | 666.6 | 726.9 | 879.7 |
| Valmiki Tiger Reserve | 181.0 | 234.9 | 213.0 | 695.8 | 639.5 | 606.2 | 907.8 |
| Chitwan National Park | 237.9 | 139.0 | 81.2 | 866.1 | 942.3 | 989.2 | 1180.6 |
| Koshi Tappu Wildlife Sanctuary | 46.6 | 49.4 | 60.5 | 51.5 | 24.0 | 35.7 | 148.9 |
| Jaldapara National Park | 65.9 | 66.6 | 49.0 | 137.7 | 111.0 | 121.6 | 230.0 |
| Manas National Park | 364.1 | 274.3 | 217.8 | 154.6 | 185.0 | 275.7 | 550.7 |
| **Total** | **1417.3** | **1209.1** | **922.8** | **3234.9** | **3257.9** | **3515.3** |  |

**Supplementary Table 1**
